# Supplementary material for: Surface-dependent magnetic behavior of α-Fe2O3 quasi-cubes induced by Mg2+ ions
Source: Royal Society of Chemistry journal article supplement (doi:10.1039/c5ce01176k), 2015-01-01
Supplement: c5ce01176k1.pdf [file c5ce01176k1.pdf]

## Electronic Supplementary Information (ESI)

### Surface-dependent magnetic behavior of $\alpha$ -Fe<sub>2</sub>O<sub>3</sub> quasi-cubes induced by Mg<sup>2+</sup> ions

Rongmei Liu,<sup>\*a</sup> Zixiang Jiang,<sup>a</sup> Qi Liu,<sup>b</sup> Xiandong Zhu,<sup>a</sup> Zhiyang Yan<sup>a</sup> and Weiye Chen<sup>a</sup>

<sup>a</sup> College of Biological and Chemical Engineering, Anhui Polytechnic University, Wuhu Anhui 241000, P. R. China,

Fax: +86 553 2871 255; Tel: +86 553 2871 255

E-mail: [liurongmei@ahpu.edu.cn](mailto:liurongmei@ahpu.edu.cn)

<sup>b</sup> College of Materials Science and Engineering, Anhui Polytechnic University, Wuhu, Anhui 241000, P. R. China.

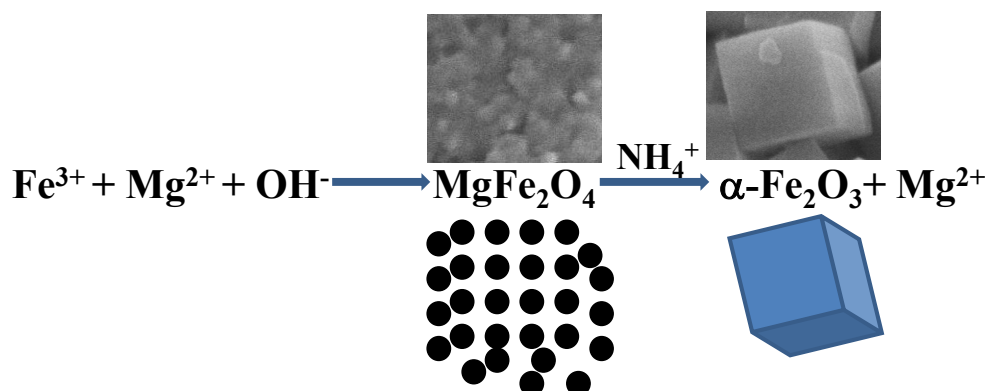

**Scheme 1:** Schematic illustration of the formation of  $\alpha$ -Fe<sub>2</sub>O<sub>3</sub> quasi-cubes.
